# Supplementary material for: Interaction of Type IV Toxin/Antitoxin Systems in Cryptic Prophages of Escherichia coli K-12
Source: MDPI journal article supplement (doi:10.3390/toxins9030077), 2017-03-01
Supplement: s1 [file s1]

# Supplementary Materials: Interaction of Type IV Toxin/Antitoxin Systems in Cryptic Prophages of *Escherichia coli* K-12

Zhongling Wen, Pengxia Wang, Chenglong Sun, Yunxue Guo and Xiaoxue Wang

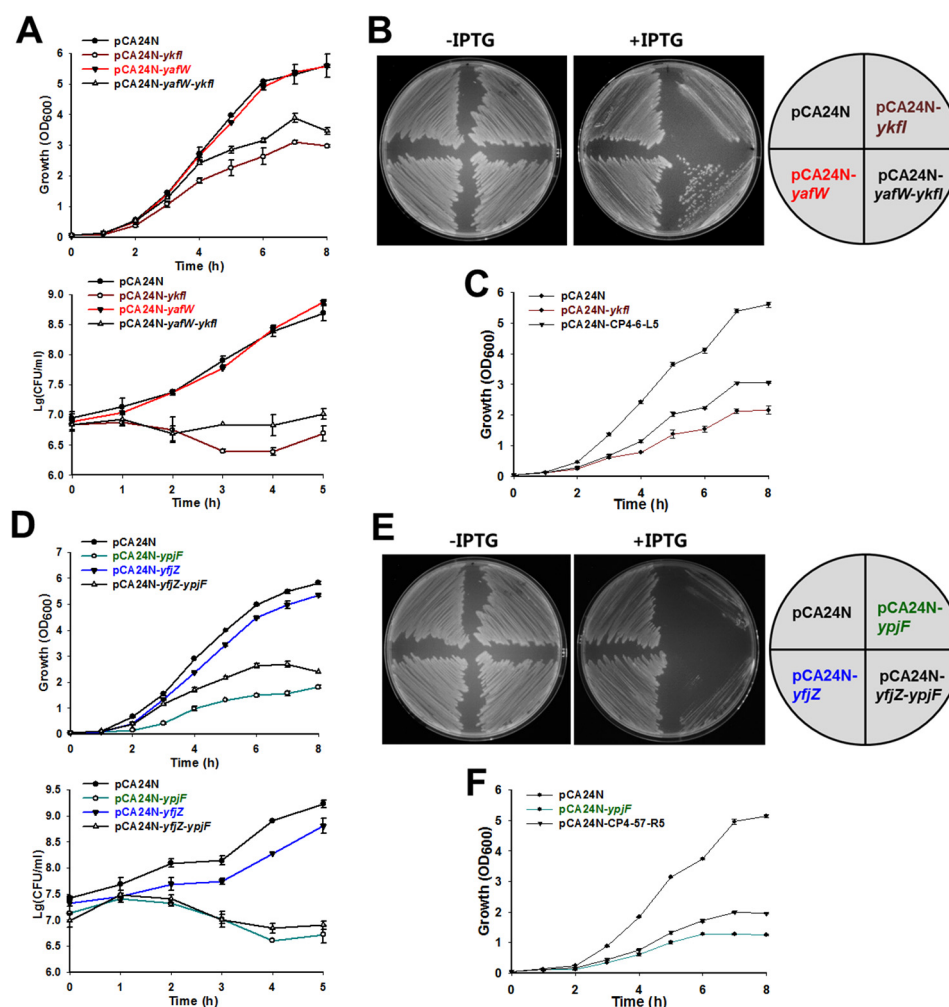

**Figure S1.** Cell growth, cell viability and toxic plates of BW25113 cells overexpressing toxins and antitoxins via pCA24N-based plasmids. (A) Cell growth (upper panel) and cell viability (lower panel) of BW25113 cells overexpressing *ykfI*, *yafW* and *yafW-ykfI*. (B) Strains from (A) were streaked onto LB plates with or without 1 mM IPTG, and were incubated for 16 h. (C) Cell growth of BW25113 cells overexpressing *ykfI* and the five genes near the left attachment site of CP4-6 (CP4-6-L5). (D) Cell growth (upper panel) and cell viability (lower panel) of BW25113 cells overexpressing *ypjF*, *yfjZ* and *yfjZ-ypjF*. (E) Strains from (D) were streaked onto LB plates with or without 1 mM IPTG, and were incubated for 16 h. (F) Cell growth of BW25113 overexpressing *ypjF* and the five genes near the right attachment site of CP4-57 (CP4-57-R5). IPTG (1 mM) was added at the beginning in A, C, D and F. Data are from two independent cultures, and standard deviations are shown.

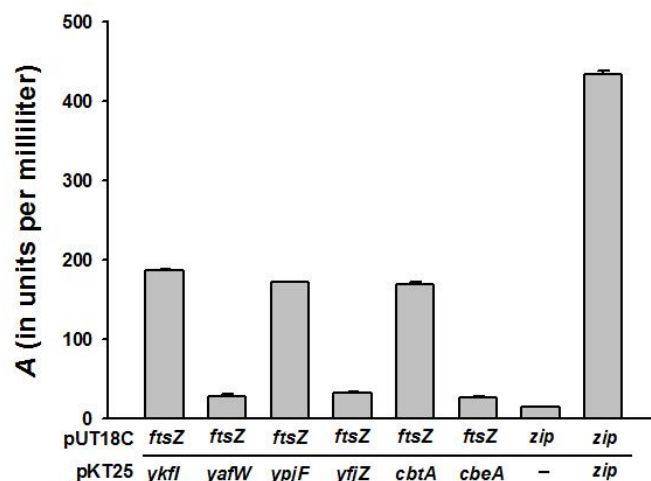

**Figure S2.** BACTH assay. The beta-gal enzymatic activity, A (in units per milliliter), was calculated according to the following equation:  $A = 200 \times ((OD_{420} \text{ of the culture} - OD_{420} \text{ in the control tube}) / (\text{minutes of incubation} \times \text{dilution factor}) / OD_{600})$ . Data are from three independent cultures, and standard deviations are as shown.

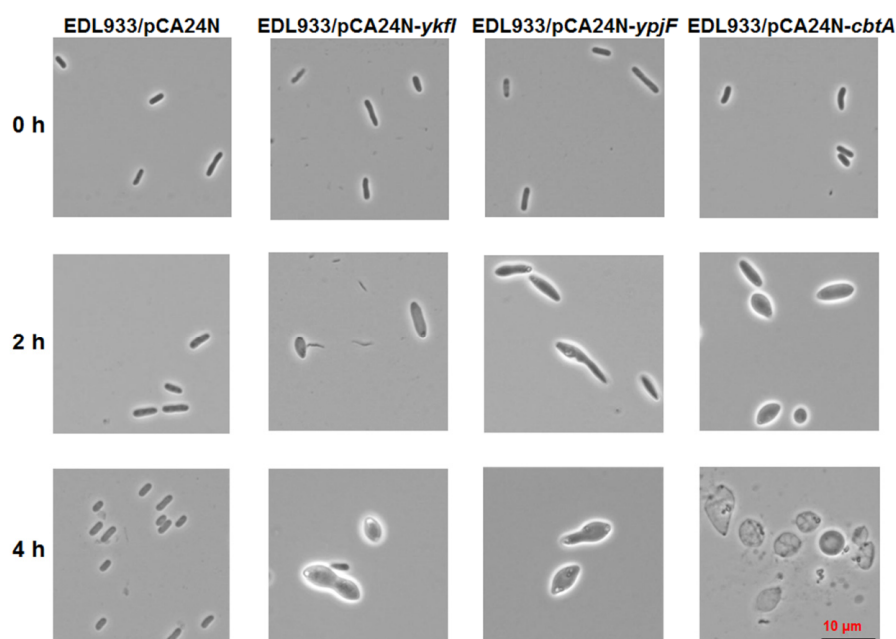

**Figure S3.** The expression of toxin Ykfl, YpfF and CbtA can produce “lemon-shaped” cells in *Escherichia coli* O157:H7 (EDL933).

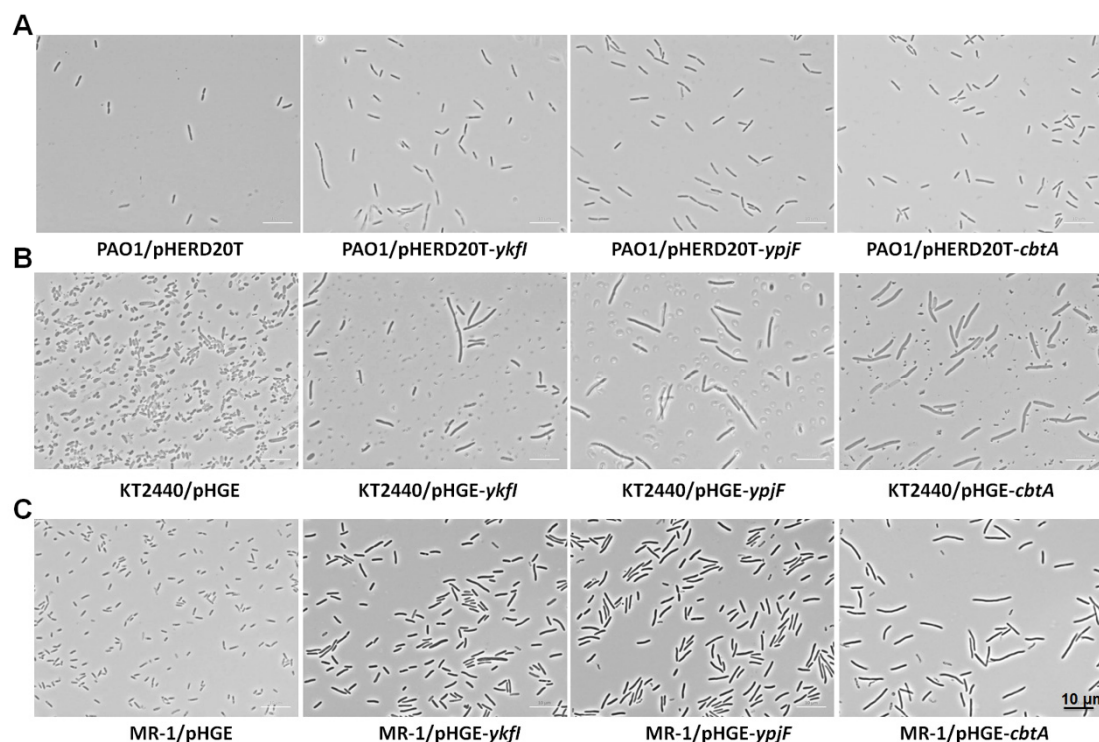

**Figure S4.** Ectopic overproduction of toxin YkfI, YjpF or CbtA can not produce “lemon-shaped” cells in (A) *Pseudomonas aeruginosa* PAO1, (B) *Pseudomonas putida* KT2440 and (C) *Shewanella oneidensis* MR-1 hosts.

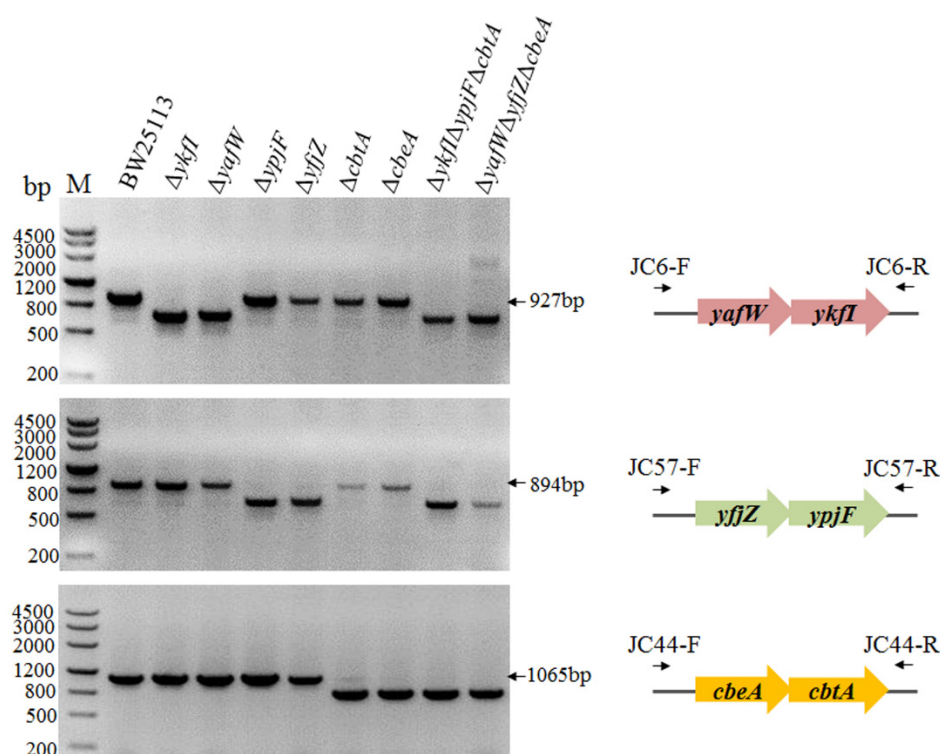

**Figure S5. PCR verification of deletion strains.** The PCR was amplified using specific primers JC6-F/R, JC57-F/R and JC44-F/R (Supplementary Table S3) flanking *yafW-ykfI*, *yjfZ-yjpF* and *cbeA-cbtA*. DNA from the deletion strains was used as the PCR templates, and BW25113 was used as a positive control. The arrows on the right side of the gels indicate the size of the PCR products using the DNA of BW25113 as templates.

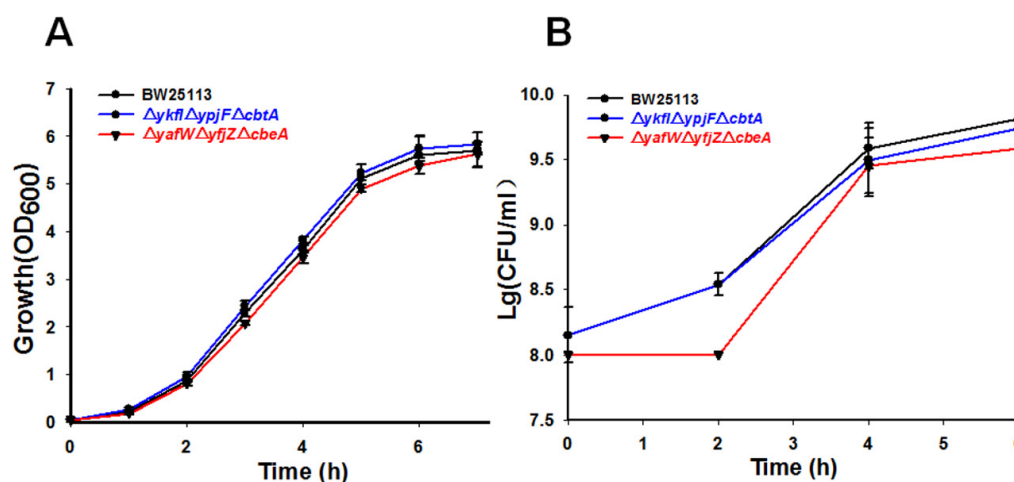

**Figure S6.** Deletion of all the three toxin genes or the three antitoxin genes did not affect cell growth (A) and cell viability (B). Data are from two independent cultures, and standard deviations are shown in A and B.

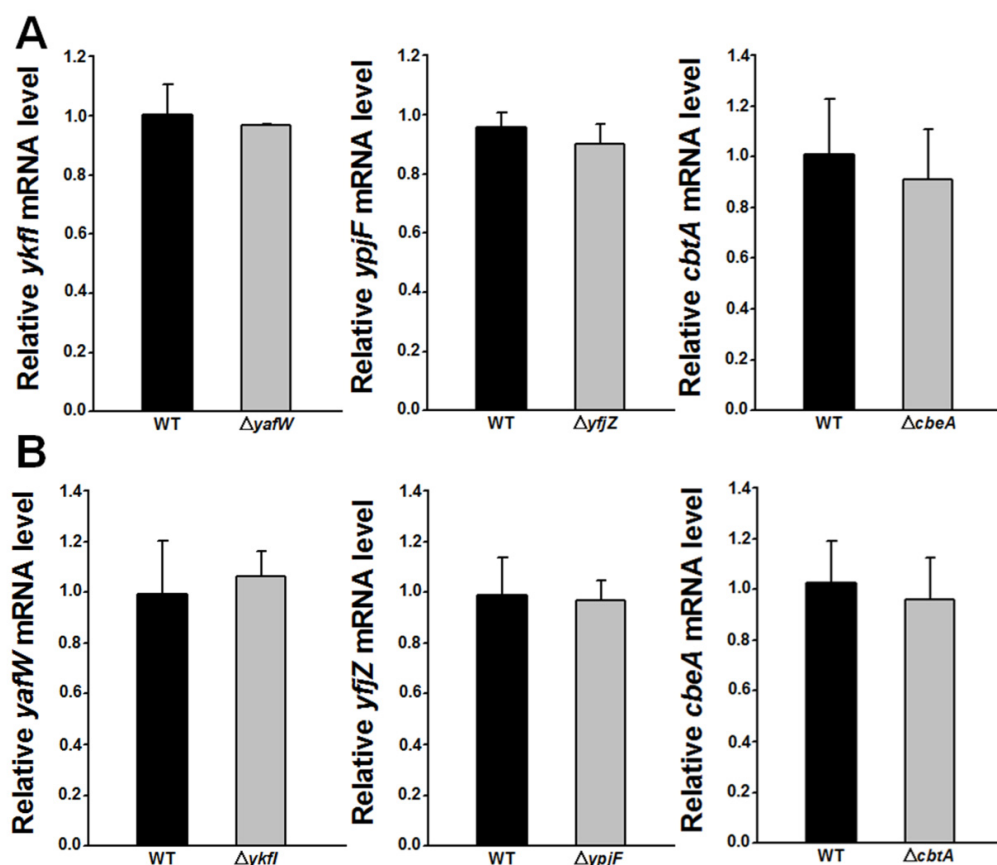

**Figure S7.** The mRNA expression of toxin or antitoxin was not changed in the corresponding antitoxin or toxin deleted strains compared with the wild type strain. (A) The relative toxins mRNA level has no difference in the BW25113 wild type strain and antitoxin deletion strains. (B) The relative antitoxins mRNA level has no difference in the BW25113 wild type strain and toxin deletion strains. Data are from two independent cultures, and standard deviations are shown in A and B.

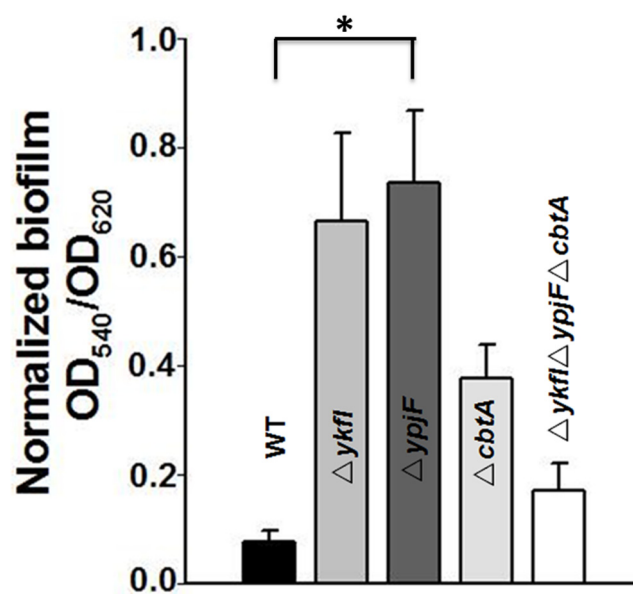

**Figure S8.** Biofilm formation of the single toxin deletion and triple toxins deletion strains as compared to the BW25113 wild type strain (WT) measured at 6 h in LB medium. Asterisks represent statistically significant differences using Kruskal-Wallis test ( $p < 0.01$  was shown in \*). Mean and standard deviations are from three independent cultures.

Table S1. Strains and plasmids used in this study.

| Strains/Plasmids                          | Description                                                                                                              | Reference or Source |
|-------------------------------------------|--------------------------------------------------------------------------------------------------------------------------|---------------------|
| <i>E. coli</i> strains                    |                                                                                                                          |                     |
| K-12 BW25113                              | <i>lacI<sup>q</sup> rrnB<sup>T14</sup> ΔlacZ<sub>WJ16</sub> hsdR514 ΔaraBA<sub>ΔAH33</sub> ΔrhaBAD<sub>LD78</sub></i>    | [1]                 |
| BTH 101                                   | <i>F<sup>-</sup>, cya-99, araD139, galE15, galK16, rpsL1 (Str<sup>r</sup>), hsdR2, mcrA1, mcrB1</i>                      | Euromedex Kit       |
| EDL933                                    | Wild type                                                                                                                | [2]                 |
| BW25113 <i>ykfI</i>                       | BW25113 Δ <i>ykfI</i> Ω Km <sup>R</sup>                                                                                  | [1]                 |
| BW25113 <i>yafW</i>                       | BW25113 Δ <i>yafW</i> Ω Km <sup>R</sup>                                                                                  | [1]                 |
| BW25113 <i>ypjF</i>                       | BW25113 Δ <i>ypjF</i> Ω Km <sup>R</sup>                                                                                  | [1]                 |
| BW25113 <i>yffZ</i>                       | BW25113 Δ <i>yffZ</i> Ω Km <sup>R</sup>                                                                                  | [1]                 |
| BW25113 <i>cbtA</i>                       | BW25113 Δ <i>cbtA</i> Ω Km <sup>R</sup>                                                                                  | [1]                 |
| BW25113 <i>cbeA</i>                       | BW25113 Δ <i>cbeA</i> Ω Km <sup>R</sup>                                                                                  | [1]                 |
| Δ <i>ykfI</i>                             | BW25113 Δ <i>ykfI</i> with Km <sup>R</sup> removed                                                                       | This study          |
| Δ <i>yafW</i>                             | BW25113 Δ <i>yafW</i> with Km <sup>R</sup> removed                                                                       | This study          |
| Δ <i>ypjF</i>                             | BW25113 Δ <i>ypjF</i> with Km <sup>R</sup> removed                                                                       | This study          |
| Δ <i>yffZ</i>                             | BW25113 Δ <i>yffZ</i> with Km <sup>R</sup> removed                                                                       | This study          |
| Δ <i>cbtA</i>                             | BW25113 Δ <i>cbtA</i> with Km <sup>R</sup> removed                                                                       | This study          |
| Δ <i>cbeA</i>                             | BW25113 Δ <i>cbeA</i> with Km <sup>R</sup> removed                                                                       | This study          |
| Δ <i>ykfI</i> Δ <i>ypjF</i> Δ <i>cbtA</i> | BW25113 Δ <i>ykfI</i> Δ <i>ypjF</i> Δ <i>cbtA</i> with Km <sup>R</sup> removed                                           | This study          |
| Δ <i>yafW</i> Δ <i>yffZ</i> Δ <i>cbeA</i> | BW25113 Δ <i>yafW</i> Δ <i>yffZ</i> Δ <i>cbeA</i> with Km <sup>R</sup> removed                                           | This study          |
| Other strains                             |                                                                                                                          |                     |
| PAO1                                      | <i>Pseudomonas aeruginosa</i> PAO1, wild type                                                                            | [3]                 |
| KT2440                                    | <i>Pseudomonas putida</i> KT2440, wild type                                                                              | ATCC 12633          |
| MR-1                                      | <i>Shewanella oneidensis</i> MR-1, wild type                                                                             | [4]                 |
| Plasmids                                  |                                                                                                                          |                     |
| pCP20                                     | Amp <sup>R</sup> and Cm <sup>R</sup> ; temperature sensitive replication, thermal induction of FLP recombinase synthesis | [5]                 |
| pCA24N                                    | Cm <sup>R</sup> ; <i>lacI<sup>q</sup></i> , IPTG inducible expression vector                                             | [6]                 |
| pCA24N- <i>ykfI</i>                       | Cm <sup>R</sup> ; expression vector for <i>ykfI</i>                                                                      | [6]                 |
| pCA24N- <i>yafW</i>                       | Cm <sup>R</sup> ; expression vector for <i>yafW</i>                                                                      | [6]                 |
| pCA24N- <i>yafW</i> - <i>ykfI</i>         | Cm <sup>R</sup> ; expression vector for <i>yafW</i> - <i>ykfI</i>                                                        | This study          |
| pCA24N- <i>ypjF</i>                       | Cm <sup>R</sup> ; expression vector for <i>ypjF</i>                                                                      | [6]                 |
| pCA24N- <i>yffZ</i>                       | Cm <sup>R</sup> ; expression vector for <i>yffZ</i>                                                                      | [6]                 |
| pCA24N- <i>yffZ</i> - <i>ypjF</i>         | Cm <sup>R</sup> ; expression vector for <i>yffZ</i> - <i>ypjF</i>                                                        | This study          |

|                       |                                                                                                                                   |            |
|-----------------------|-----------------------------------------------------------------------------------------------------------------------------------|------------|
| pCA24N-CP4-6-L5       | Cm <sup>R</sup> ; expression vector for <i>yafX</i> , <i>ykfG</i> , <i>ykfH</i> , <i>yafW</i> and <i>ykfI</i> of prophage CP4-6   | This study |
| pCA24N-CP4-57-R5      | Cm <sup>R</sup> ; expression vector for <i>yjfX</i> , <i>yjfY</i> , <i>yppJ</i> , <i>yjfZ</i> and <i>yppF</i> of prophage CP4-57  | This study |
| pBAD- <i>ykfI</i>     | Amp <sup>R</sup> ; expression vector for <i>ykfI</i>                                                                              | This study |
| pBAD- <i>yppF</i>     | Amp <sup>R</sup> ; expression vector for <i>yppF</i>                                                                              | This study |
| pBAD- <i>cbtA</i>     | Amp <sup>R</sup> ; expression vector for <i>cbtA</i>                                                                              | This study |
| pET28b- <i>yafW</i>   | Km <sup>R</sup> ; expression vector for <i>yafW</i>                                                                               | This study |
| pET28b- <i>yjfZ</i>   | Km <sup>R</sup> ; expression vector for <i>yjfZ</i>                                                                               | This study |
| pET28b- <i>cbeA</i>   | Km <sup>R</sup> ; expression vector for <i>cbeA</i>                                                                               | This study |
| pHGE                  | pHGE-P <sub>lac</sub> , Km <sup>R</sup> , IPTG inducible expression vector                                                        | [4]        |
| pHGE- <i>ykfI</i>     | Km <sup>R</sup> ; expression vector for <i>ykfI</i>                                                                               | This study |
| pHGE- <i>yppF</i>     | Km <sup>R</sup> ; expression vector for <i>yppF</i>                                                                               | This study |
| pHGE- <i>cbtA</i>     | Km <sup>R</sup> ; expression vector for <i>cbtA</i>                                                                               | This study |
| pKT25- <i>zip</i>     | Km <sup>R</sup> ; derived from pKT25. Sequence coding for the leucine zipper region of the GCN4 yeast protein. Positive control   | [7]        |
| pKT25- <i>ftsZ</i>    | Km <sup>R</sup> ; expression vector for <i>FtsZ</i>                                                                               | This study |
| pKT25- <i>mreB</i>    | Km <sup>R</sup> ; expression vector for <i>MreB</i>                                                                               | This study |
| pUT18C                | Amp <sup>R</sup> ; derived from pUC19. Plac-MCS( <i>HindIII-SphI-PstI-SalI-XbaI-BamHI-SmaI-KpnI-SacI-EcoRI</i> )-T18              | [7]        |
| pUT18C- <i>zip</i>    | Amp <sup>R</sup> ; derived from pUT18C. Sequence coding for the leucine zipper region of the GCN4 yeast protein. Positive control | [7]        |
| pUT18C- <i>ykfI</i>   | Amp <sup>R</sup> ; expression vector for <i>ykfI</i>                                                                              | This study |
| pUT18C- <i>yafW</i>   | Amp <sup>R</sup> ; expression vector for <i>yafW</i>                                                                              | This study |
| pUT18C- <i>yppF</i>   | Amp <sup>R</sup> ; expression vector for <i>yppF</i>                                                                              | This study |
| pUT18C- <i>yjfZ</i>   | Amp <sup>R</sup> ; expression vector for <i>yjfZ</i>                                                                              | This study |
| pUT18C- <i>cbtA</i>   | Amp <sup>R</sup> ; expression vector for <i>cbtA</i>                                                                              | This study |
| pUT18C- <i>cbeA</i>   | Amp <sup>R</sup> ; expression vector for <i>cbeA</i>                                                                              | This study |
| pHERD20T- <i>ykfI</i> | Car <sup>R</sup> ; expression vector for <i>ykfI</i>                                                                              | This study |
| pHERD20T- <i>yppF</i> | Car <sup>R</sup> ; expression vector for <i>yppF</i>                                                                              | This study |
| pHERD20T- <i>cbtA</i> | Car <sup>R</sup> ; expression vector for <i>cbtA</i>                                                                              | This study |

---

Km<sup>R</sup>, Cm<sup>R</sup>, Amp<sup>R</sup> and Car<sup>R</sup> are resistance to kanamycin, chloramphenicol, ampicillin and carbenicillin, respectively.

**Table S2.** Minimum inhibitory concentrations (MICs) value for the BW25113 wild type strain and the deletion mutant strains.

| Strains                             | Antibiotics ( $\mu\text{g/ml}$ ) |    |     |     |     |     |
|-------------------------------------|----------------------------------|----|-----|-----|-----|-----|
|                                     | Cip                              | Cm | Kan | Tet | PB  | Fox |
| WT                                  | 0.05                             | 6  | 6   | 1   | 0.5 | 4   |
| $\Delta ykfI$                       | 0.05                             | 4  | 6   | 1   | 0.5 | 4   |
| $\Delta yafW$                       | 0.05                             | 8  | 6   | 1   | 0.5 | 8   |
| $\Delta ypjF$                       | 0.05                             | 8  | 6   | 1   | 0.5 | 4   |
| $\Delta yfjZ$                       | 0.05                             | 8  | 6   | 1   | 0.5 | 8   |
| $\Delta cbtA$                       | 0.1                              | 4  | 8   | 1   | 0.5 | 4   |
| $\Delta cbeA$                       | 0.1                              | 4  | 8   | 1   | 0.5 | 4   |
| $\Delta ykfI\Delta ypjF\Delta cbtA$ | 0.1                              | 4  | 8   | 1   | 0.5 | 4   |
| $\Delta yafW\Delta yfjZ\Delta cbeA$ | 0.1                              | 4  | 8   | 1   | 0.5 | 4   |

Cip: Ciprofloxacin, Cm: Chloramphenicol, Kan: Kanamycin, Tet: Tetracycline, PB: Polymyxin B, Fox: Cefoxitin.

**Table S3.** Primers used in this study.

| Primers               | Sequences (5'-3') <sup>a</sup>     |
|-----------------------|------------------------------------|
| DNA sequencing        |                                    |
| pCA24N-F              | GATAACAATTTACACAGAATT              |
| pCA24N-R              | GTCAGAGGTTTTCACCGTCATCA            |
| pHGE-F                | AGCTGTTGACAATTAATCATCG             |
| pHGE-R                | CACTTCTGAGTTCGGCATGG               |
| pBAD-F                | ATGCCATAGCATTTTATCCA               |
| pBAD-R                | TCTGATTTAATCTGTATCAGG              |
| T7-F                  | TAATACGACTCACTATAGGG               |
| T7-R                  | TATGCTAGTTATTGCTCAG                |
| pKT25-F               | GCGAGGGCTATGCTTCTACG               |
| pKT25-R               | GGGCTGGCTTAACATGCGG                |
| pUT18C-F              | CGCATCTGTCCAACCTCCGC               |
| pUT18C-R              | CGCCAGGGTTTCCCAGTCA                |
| pHERD20T-F            | ATCGCAACTCTCTACTGTTCT              |
| pHERD20T-R            | TGCAAGGCGATTAAAGTTGGGT             |
| JC6-F                 | GGGACGTTCCGGATATCGC                |
| JC6-R                 | CTTCTGTTGCATGATTGTT                |
| JC57-F                | ATATCACAGGAGTCTGGC                 |
| JC57-R                | CCATTGTTGGTCCTAAAAGAAAAT           |
| JC44-F                | AGTTTGGTCCGATATGCC                 |
| JC44-R                | TAACCGTTTTAGCGGCCT                 |
| Plasmids construction |                                    |
| pCA24N-yafW-ykfI-F    | ACGCGTTCGACAGCAACCCTACCAGGGG       |
| pCA24N-yafW-ykfI-R    | CCCAGCTTTCATCGTACTACGTTGTTACGGC    |
| pCA24N-yfjZ-ypjF-F    | ACGCGTTCGACAGCAACACCACATGGGG       |
| pCA24N-yfjZ-ypjF-R    | CCCAGCTTTCATCGTACTACGTTGTTACGGC    |
| pCA24N-CP4-6-L5-F     | ACGCGTTCGACATGACAACACAGACGAGCAGC   |
| pCA24N-CP4-6-L5-R     | CCCAGCTTTCATCGTACTACGTTGTTACGGC    |
| pCA24N-CP4-57-R5-F    | ACGCGTTCGACATGACAACACAGACACAGTACG  |
| pCA24N-CP4-57-R5-R    | CCCAGCTTTCATCGTACTACGTTGTTACGGC    |
| pHGE-ykfI-F           | CCGGAATTCATGAAAACCTTACCTGCAATAACTC |
| pHGE-ykfI-R           | CCCAGCTTTCATCGTACTACGTTGTTACGGC    |
| pHGE-ypjF-F           | CCGGAATTCATGAACACTCTACCTGCTAC      |
| pHGE-ypjF-R           | CCCAGCTTTCATCGTACTACGTTGTTACGGC    |
| pHGE-cbtA-F           | CCGGAATTCATGAAAACATTACCTGTATTACCC  |
| pHGE-cbtA-R           | CCCAGCTTTCATTTGCGCTCCGGATAC        |

|                 |                                                                   |
|-----------------|-------------------------------------------------------------------|
| pBAD-ykfl-F     | CATGCCATGGGCAAAACCTTTACCTGCAAT                                    |
| pBAD-ykfl-R     | CCCAAGCTTTCATCGTACTACGTTGTACGGC                                   |
| pBAD-ypjF-F     | CATGCCATGGGCAACACTCTACCTGC                                        |
| pBAD-ypjF-R     | CCCAAGCTTTTATTTACATTAGTTTTTAG                                     |
| pBAD-cbtA-F     | CATGCCATGGGCAAAACATTACCTGTATTACCC                                 |
| pBAD-cbtA-R     | CCCAAGCTTTCATTTTCGCCTCCGGATAC                                     |
| pET28b-yafW-F   | TTTAAGAAGGAGATATACCATGGGCAGCAGCCATCATCATCATCACAGCAACC<br>CTACCAGG |
| pET28b-yafW-R   | GCTCGAGTGC GGCCGCAAGCTTTTAACGCTGAGTG GGG                          |
| pET28b-yfjZ-F   | TTTAAGAAGGAGATATACCATGGGCAGCAGCCATCATCATCATCACAGCAACA<br>CCACATG  |
| pET28b-yfjZ-R   | GCTCGAGTGC GGCCGCAAGCTTTTAGCGTTGAGTG GGG                          |
| pET28b-cbeA-F   | TTTAAGAAGGAGATATACCGTGCAGACACACTCCCCGGG                           |
| pET28b-cbeA-R   | GCTCGAGTGC GGCCGCTTAATTTTTCATTTTCGGGC                             |
| pUT18C-ykfl-F   | CGGGGTACCGAAAACCTTTACCTGCAAT                                      |
| pUT18C-ykfl-R   | CCGGAATTCATCGTACTACGTTGTACGGC                                     |
| pUT18C-yafW-F   | CGGGGTACCGAGCAACCCTACCAGG GG                                      |
| pUT18C-yafW-R   | CCGGAATTCCTTAACGCTGAGTG GGG                                       |
| pUT18C-ypjF-F   | CGGGGTACCGAACACTCTACCTGC                                          |
| pUT18C-ypjF-R   | CCGGAATTCCTTATTTACATTAGTTTTTAG                                    |
| pUT18C-yfjZ-F   | CGGGGTACCGAGCAACACCACATGGGG                                       |
| pUT18C-yfjZ-R   | CCGGAATTCCTTAGCGTTGAGTG GGG                                       |
| pUT18C-cbtA-F   | CCGGAATTCCTCATTTTCGCCTCCGGATAC                                    |
| pUT18C-cbtA-R   | CGGGGTACCGAAAACATTACCTGTATTACCC                                   |
| pUT18C-cbeA-F   | CGGGGTACCGGTGTCAGACACACTCCCCGGG                                   |
| pUT18C-cbeA-R   | CCGGAATTCCTTAATTTTTCATTTTCGGGC                                    |
| pKT25-FtsZ-F    | CTAGAGGATCCCCGGGTACCTTTTGAACCAATGGAACCTTACC                       |
| pKT25-FtsZ-R    | GAATTCCTAGTTACTTAGTTAATCAGCTTGCTTACGCAG                           |
| pKT25-MreB-F    | CTAGAGGATCCCCGGGTACCTTTGAAAAAATTCGTGGCATGTT                       |
| pKT25-MreB-R    | GAATTCCTAGTTACTTAGTTACTCTTCGCTGAACAGGTC                           |
| pHERD20T-Ykfl-F | CCGGAATTCGATGAAAACCTTTACCTGCAATAACTC                              |
| pHERD20T-Ykfl-R | CCCAAGCTTTCATCGTACTACGTTGTACGGC                                   |
| pHERD20T-YpjF-F | CCGGAATTCGATGAACACTCTACCTGCTAC                                    |
| pHERD20T-YpjF-R | CCCAAGCTTTTATTTACATTAGTTTTTAGCAAGC                                |
| pHERD20T-CbtA-F | CCGGAATTCGATGAAAACATTACCTGTATTACCC                                |
| pHERD20T-CbtA-R | CCCAAGCTTTCATTTTCGCCTCCGGATAC                                     |
| qRT-PCR         |                                                                   |
| rrsG-F          | TATTGCACAATGGGCGCAAG                                              |
| rrsG-R          | ACTTAACAAACCGCTGCGT                                               |
| q-ykfl-F        | CATTCTGCAATGAGGCTGTGA                                             |
| q-ykfl-R        | CAGCCCGGAGATAAGGAGATT                                             |
| q-ypjF-F        | CAGTGGCTGTCTGGCAAATG                                              |
| q-ypjF-R        | TCCACCAGAAAAATTGACTGCAT                                           |
| q-cbtA-F        | TTCTCGCCCGTCTCCTGTT                                               |
| q-cbtA-R        | ACCGCATCACACAGTGAAATG                                             |
| q-yafW-F        | CCTGCAGCGGGAGATTACAC                                              |
| q-yafW-R        | GAGGATAAAGTGCGGGAATGTT                                            |
| q-yfjZ-F        | GGCCTGCAGCGAGATATCAC                                              |
| q-yfjZ-R        | TGGCTGATAAAATGTGGAATACC                                           |
| q-cbeA-F        | GCTGCTGATGAAACAACCTGGAA                                           |
| q-cbeA-R        | GTCCGATAAACAGCCAGATAAACG                                          |

<sup>a</sup>, restriction sites included in oligonucleotide sequences are underlined.

**Supplementary Video 1.** Over-production of toxin YkfI cause “lemon-shaped” cells to further form “gourd-shaped” cells. This video was adjusted to 6× in speed to reduce time duration. Cell burst was observed at 1 s, 4 s, 11 s and 17 s.

## References

1. Baba, T.; Ara, T.; Hasegawa, M.; Takai, Y.; Okumura, Y.; Baba, M.; Datsenko, K.A.; Tomita, M.; Wanner, B.L.; Mori, H. Construction of *Escherichia coli* K-12 in-frame, single-gene knockout mutants: The Keio collection. *Mol. Syst. Biol.* **2006**, *2*, doi:10.1038/msb4100050.
2. O'Brien, A.D.; Lively, T.A.; Chen, M.E.; Rothman, S.W.; Formal, S.B. *Escherichia coli* O157:H7 strains associated with hemorrhagic colitis in the United States produce a Shigella dysenteriae 1 (SHIGA) like cytotoxin. *Lancet* **1983**, *1*, 702–702.
3. Stover, C.K.; Pham, X.Q.; Erwin, A.L.; Mizoguchi, S.D.; Warrenner, P.; Hickey, M.J.; Brinkman, F.S.L.; Hufnagle, W.O.; Kowalik, D.J.; Lagrou, M., et al. Complete genome sequence of *Pseudomonas aeruginosa* PAO1, an opportunistic pathogen. *Nature* **2000**, *406*, 959–964.
4. Shi, M.; Wu, L.; Xia, Y.; Chen, H.; Luo, Q.; Sun, L.; Gao, H. Exoprotein Production Correlates with Morphotype Changes of Nonmotile *Shewanella oneidensis* Mutants. *J. Bacteriol.* **2013**, *195*, 1463–1474.
5. Datsenko, K.A.; Wanner, B.L. One-step inactivation of chromosomal genes in *Escherichia coli* K-12 using pcr products. *Proc. Natl. Acad. Sci. USA* **2000**, *97*, 6640–6645.
6. Kitagawa, M.; Ara, T.; Arifuzzaman, M.; Ioka-Nakamichi, T.; Inamoto, E.; Toyonaga, H.; Mori, H. Complete set of ORF clones of *Escherichia coli* ASKA library (A complete set of *E. coli* K-12 ORF archive): Unique resources for biological research. *DNA Res.* **2005**, *12*, 291–299.
7. Karimova, G.; Pidoux, J.; Ullmann, A.; Ladant, D. A bacterial two-hybrid system based on a reconstituted signal transduction pathway. *Proc. Natl. Acad. Sci. USA* **1998**, *95*, 5752–5756.
